# Supplementary material for: Bead-based immunoassay allows sub-picogram detection of histidine-rich protein 2 from Plasmodium falciparum and estimates reliability of malaria rapid diagnostic tests
Source: PLoS One. 2017 Feb 13;12(2):e0172139. doi: 10.1371/journal.pone.0172139 (PMC5305216; doi:10.1371/journal.pone.0172139)
Supplement: S7 Table — (XLSX) [file pone.0172139.s013.xlsx]

## Sheet: haiti_database
Rogier, et al, Bead Based Immunoassay Allows Sub-Picogram Detection of Histidine-Rich Protein 2 from Plasmodium falciparum and Estimates Reliability of Malaria Rapid Diagnostic Tests
S7 Table. Data from Haiti Nationwide Survey
Country	Age	RDT result	hrp2_MFI
Haiti	19	0	-19.5
Haiti	37	0	-18.75
Haiti	35	0	-18
Haiti	13	0	-18
Haiti	13	0	-18
Haiti	44	0	-16.5
Haiti	23	0	-16.5
Haiti	25	0	-16.5
Haiti	26	0	-16.5
Haiti	48	0	-16.5
Haiti	15	0	-16.3
Haiti	31	0	-15.8
Haiti	53	0	-15.75
Haiti	NA	NA	-15.75
Haiti	11	0	-15.75
Haiti	17	0	-15.75
Haiti	29	0	-15.3
Haiti	75	0	-15.3
Haiti	22	0	-15.3
Haiti	4	0	-15
Haiti	17	0	-15
Haiti	43	0	-15
Haiti	8	0	-15
Haiti	8	0	-15
Haiti	22	0	-15
Haiti	3	0	-15
Haiti	50	0	-15
Haiti	5	0	-15
Haiti	80	0	-15
Haiti	20	0	-15
Haiti	14	0	-15
Haiti	33	0	-14.8
Haiti	2	0	-14.8
Haiti	7	0	-14.8
Haiti	54	0	-14.6
Haiti	9	0	-14.3
Haiti	62	0	-14.3
Haiti	19	0	-14.3
Haiti	6	0	-14.3
Haiti	32	0	-14.25
Haiti	50	0	-14.25
Haiti	75	0	-14.25
Haiti	21	0	-14.25
Haiti	28	0	-14.25
Haiti	3	0	-14.25
Haiti	12	0	-14.25
Haiti	21	0	-14.25
Haiti	44	0	-14.25
Haiti	6	0	-14.25
Haiti	98	0	-14.25
Haiti	32	0	-14.25
Haiti	16	0	-14.25
Haiti	46	0	-14.25
Haiti	33	0	-14.25
Haiti	40	0	-14
Haiti	21	0	-13.95
Haiti	7	0	-13.95
Haiti	49	0	-13.8
Haiti	16	0	-13.8
Haiti	45	0	-13.8
Haiti	73	0	-13.8
Haiti	38	0	-13.8
Haiti	18	0	-13.8
Haiti	5	0	-13.6
Haiti	24	0	-13.5
Haiti	28	0	-13.5
Haiti	0	0	-13.5
Haiti	68	0	-13.5
Haiti	18	0	-13.5
Haiti	6	0	-13.5
Haiti	15	0	-13.5
Haiti	33	0	-13.5
Haiti	4	0	-13.5
Haiti	51	0	-13.5
Haiti	0	0	-13.5
Haiti	18	0	-13.5
Haiti	72	0	-13.5
Haiti	7	0	-13.5
Haiti	24	0	-13.5
Haiti	17	0	-13.5
Haiti	70	0	-13.5
Haiti	5	0	-13.5
Haiti	3	0	-13.3
Haiti	52	0	-13.3
Haiti	29	0	-13.3
Haiti	43	0	-13.3
Haiti	16	0	-13.3
Haiti	NA	NA	-13.3
Haiti	18	0	-13
Haiti	18	0	-13
Haiti	70	0	-12.8
Haiti	14	0	-12.8
Haiti	68	0	-12.8
Haiti	9	0	-12.8
Haiti	40	0	-12.75
Haiti	14	0	-12.75
Haiti	5	0	-12.75
Haiti	35	0	-12.75
Haiti	34	0	-12.75
Haiti	10	0	-12.75
Haiti	5	0	-12.75
Haiti	12	0	-12.75
Haiti	21	0	-12.75
Haiti	36	0	-12.75
Haiti	22	0	-12.75
Haiti	23	0	-12.75
Haiti	20	0	-12.75
Haiti	29	0	-12.75
Haiti	7	0	-12.75
Haiti	15	0	-12.75
Haiti	12	0	-12.75
Haiti	50	0	-12.75
Haiti	6	0	-12.75
Haiti	7	0	-12.6
Haiti	18	0	-12.6
Haiti	4	0	-12.6
Haiti	2	0	-12.6
Haiti	15	0	-12.45
Haiti	58	0	-12.45
Haiti	5	0	-12.45
Haiti	14	0	-12.45
Haiti	16	0	-12.45
Haiti	24	0	-12.3
Haiti	60	0	-12.3
Haiti	9	0	-12.3
Haiti	45	0	-12.3
Haiti	38	0	-12.3
Haiti	36	0	-12.3
Haiti	18	0	-12.3
Haiti	2	0	-12.3
Haiti	61	0	-12.3
Haiti	18	0	-12.3
Haiti	50	0	-12
Haiti	70	0	-12
Haiti	8	0	-12
Haiti	82	0	-12
Haiti	70	0	-12
Haiti	25	0	-12
Haiti	17	0	-12
Haiti	3	0	-12
Haiti	9	0	-12
Haiti	57	0	-12
Haiti	22	0	-12
Haiti	11	0	-12
Haiti	24	0	-12
Haiti	49	0	-12
Haiti	8	0	-12
Haiti	7	0	-12
Haiti	50	0	-12
Haiti	54	0	-12
Haiti	42	0	-12
Haiti	25	0	-12
Haiti	16	0	-12
Haiti	51	0	-12
Haiti	18	0	-12
Haiti	1	0	-12
Haiti	48	0	-12
Haiti	10	0	-12
Haiti	28	0	-12
Haiti	14	0	-12
Haiti	39	0	-12
Haiti	59	0	-12
Haiti	38	0	-12
Haiti	4	0	-12
Haiti	25	0	-12
Haiti	60	0	-12
Haiti	9	0	-12
Haiti	48	0	-12
Haiti	NA	NA	-12
Haiti	9	0	-12
Haiti	3	0	-12
Haiti	14	0	-12
Haiti	12	0	-12
Haiti	58	0	-12
Haiti	19	0	-12
Haiti	2	0	-12
Haiti	40	0	-12
Haiti	5	0	-12
Haiti	28	0	-12
Haiti	57	0	-12
Haiti	12	0	-12
Haiti	28	0	-11.8
Haiti	2	0	-11.7
Haiti	28	0	-11.6
Haiti	98	0	-11.6
Haiti	26	0	-11.6
Haiti	15	0	-11.3
Haiti	33	0	-11.3
Haiti	9	0	-11.3
Haiti	5	0	-11.3
Haiti	6	0	-11.3
Haiti	77	0	-11.3
Haiti	17	0	-11.3
Haiti	62	0	-11.25
Haiti	15	0	-11.25
Haiti	45	0	-11.25
Haiti	22	0	-11.25
Haiti	2	0	-11.25
Haiti	14	0	-11.25
Haiti	35	0	-11.25
Haiti	11	0	-11.25
Haiti	50	0	-11.25
Haiti	19	0	-11.25
Haiti	16	0	-11.25
Haiti	51	0	-11.25
Haiti	39	0	-11.25
Haiti	75	0	-11.25
Haiti	83	0	-11.25
Haiti	32	0	-11.25
Haiti	24	0	-11.25
Haiti	19	0	-11.25
Haiti	0	0	-11.25
Haiti	9	0	-11.25
Haiti	12	0	-11.25
Haiti	30	0	-11.25
Haiti	30	0	-11.25
Haiti	6	0	-11.25
Haiti	6	0	-11.25
Haiti	4	0	-11.25
Haiti	6	0	-11.25
Haiti	15	0	-11.25
Haiti	16	0	-11.25
Haiti	9	0	-11.25
Haiti	28	0	-11.25
Haiti	54	0	-11.25
Haiti	15	0	-11.25
Haiti	9	0	-11.25
Haiti	6	0	-11.25
Haiti	1	0	-11.25
Haiti	28	0	-11.25
Haiti	40	0	-11.25
Haiti	17	0	-11.25
Haiti	25	0	-11.25
Haiti	2	0	-11.25
Haiti	NA	NA	-11.025
Haiti	32	0	-11
Haiti	4	0	-11
Haiti	13	0	-11
Haiti	1	0	-11
Haiti	36	0	-11
Haiti	83	0	-11
Haiti	68	0	-10.95
Haiti	53	0	-10.95
Haiti	39	0	-10.95
Haiti	15	0	-10.95
Haiti	56	0	-10.95
Haiti	0	0	-10.95
Haiti	39	0	-10.95
Haiti	9	0	-10.95
Haiti	72	0	-10.95
Haiti	8	0	-10.8
Haiti	21	0	-10.8
Haiti	66	0	-10.8
Haiti	54	0	-10.6
Haiti	41	0	-10.6
Haiti	12	0	-10.6
Haiti	54	0	-10.6
Haiti	20	0	-10.6
Haiti	18	0	-10.6
Haiti	59	0	-10.6
Haiti	10	0	-10.6
Haiti	1	0	-10.6
Haiti	15	0	-10.6
Haiti	7	0	-10.6
Haiti	NA	NA	-10.5
Haiti	30	0	-10.5
Haiti	45	0	-10.5
Haiti	45	0	-10.5
Haiti	16	0	-10.5
Haiti	19	0	-10.5
Haiti	23	0	-10.5
Haiti	14	0	-10.5
Haiti	8	0	-10.5
Haiti	8	0	-10.5
Haiti	24	0	-10.5
Haiti	30	0	-10.5
Haiti	62	0	-10.5
Haiti	36	0	-10.5
Haiti	5	0	-10.5
Haiti	46	0	-10.5
Haiti	80	0	-10.5
Haiti	24	0	-10.5
Haiti	13	0	-10.5
Haiti	26	0	-10.5
Haiti	49	0	-10.5
Haiti	30	0	-10.5
Haiti	35	0	-10.5
Haiti	5	0	-10.5
Haiti	10	0	-10.5
Haiti	15	0	-10.5
Haiti	10	0	-10.5
Haiti	22	0	-10.5
Haiti	15	0	-10.5
Haiti	12	0	-10.5
Haiti	58	0	-10.5
Haiti	16	0	-10.5
Haiti	1	0	-10.5
Haiti	50	0	-10.5
Haiti	9	0	-10.5
Haiti	8	0	-10.5
Haiti	15	0	-10.5
Haiti	16	0	-10.5
Haiti	10	0	-10.5
Haiti	20	0	-10.5
Haiti	8	0	-10.5
Haiti	13	0	-10.5
Haiti	11	0	-10.5
Haiti	4	0	-10.5
Haiti	28	0	-10.5
Haiti	57	0	-10.3
Haiti	28	0	-10.3
Haiti	19	0	-10.3
Haiti	19	0	-10.3
Haiti	21	0	-10.3
Haiti	66	0	-10.3
Haiti	5	0	-10.3
Haiti	30	0	-10.3
Haiti	28	0	-10.2
Haiti	4	0	-10.2
Haiti	66	0	-10.2
Haiti	12	0	-10.2
Haiti	25	0	-10.2
Haiti	80	0	-10
Haiti	75	0	-10
Haiti	16	0	-10
Haiti	65	0	-10
Haiti	10	0	-10
Haiti	23	0	-10
Haiti	17	0	-10
Haiti	13	0	-10
Haiti	70	0	-10
Haiti	39	0	-10
Haiti	67	0	-10
Haiti	3	0	-10
Haiti	5	0	-10
Haiti	66	0	-9.8
Haiti	NA	NA	-9.75
Haiti	25	0	-9.75
Haiti	45	0	-9.75
Haiti	27	0	-9.75
Haiti	13	0	-9.75
Haiti	28	0	-9.75
Haiti	32	0	-9.75
Haiti	21	0	-9.75
Haiti	48	0	-9.75
Haiti	75	0	-9.75
Haiti	39	0	-9.75
Haiti	27	0	-9.75
Haiti	29	0	-9.75
Haiti	23	0	-9.75
Haiti	48	0	-9.75
Haiti	15	0	-9.75
Haiti	82	0	-9.75
Haiti	47	0	-9.75
Haiti	2	0	-9.75
Haiti	15	0	-9.75
Haiti	45	0	-9.75
Haiti	65	0	-9.75
Haiti	27	0	-9.75
Haiti	23	0	-9.75
Haiti	16	0	-9.75
Haiti	13	0	-9.75
Haiti	24	0	-9.75
Haiti	52	0	-9.75
Haiti	23	0	-9.75
Haiti	40	0	-9.75
Haiti	78	0	-9.75
Haiti	48	0	-9.75
Haiti	2	0	-9.75
Haiti	1	0	-9.75
Haiti	13	0	-9.75
Haiti	41	0	-9.75
Haiti	72	0	-9.75
Haiti	12	0	-9.75
Haiti	6	0	-9.75
Haiti	70	0	-9.75
Haiti	3	0	-9.75
Haiti	27	0	-9.75
Haiti	16	0	-9.75
Haiti	23	0	-9.75
Haiti	20	0	-9.75
Haiti	14	0	-9.75
Haiti	5	0	-9.6
Haiti	43	0	-9.6
Haiti	15	0	-9.5
Haiti	2	0	-9.45
Haiti	80	0	-9.45
Haiti	15	0	-9.45
Haiti	73	0	-9.45
Haiti	41	0	-9.45
Haiti	65	0	-9.45
Haiti	24	0	-9.45
Haiti	35	0	-9.45
Haiti	8	0	-9.45
Haiti	46	0	-9.45
Haiti	52	0	-9.45
Haiti	28	0	-9.45
Haiti	25	0	-9.45
Haiti	9	0	-9.45
Haiti	7	0	-9.45
Haiti	28	0	-9.3
Haiti	1	0	-9.3
Haiti	10	0	-9.3
Haiti	24	0	-9
Haiti	34	0	-9
Haiti	40	0	-9
Haiti	38	0	-9
Haiti	4	0	-9
Haiti	48	0	-9
Haiti	30	0	-9
Haiti	24	0	-9
Haiti	30	0	-9
Haiti	25	0	-9
Haiti	52	0	-9
Haiti	30	0	-9
Haiti	28	0	-9
Haiti	39	0	-9
Haiti	14	NA	-9
Haiti	6	0	-9
Haiti	NA	NA	-9
Haiti	34	0	-9
Haiti	53	0	-9
Haiti	17	0	-9
Haiti	32	0	-9
Haiti	66	0	-9
Haiti	25	0	-9
Haiti	9	0	-9
Haiti	30	0	-9
Haiti	17	0	-9
Haiti	39	0	-9
Haiti	44	0	-9
Haiti	41	0	-9
Haiti	39	0	-9
Haiti	3	0	-9
Haiti	33	0	-9
Haiti	22	0	-9
Haiti	31	0	-9
Haiti	8	0	-9
Haiti	30	0	-9
Haiti	24	0	-9
Haiti	35	0	-9
Haiti	18	0	-9
Haiti	73	0	-9
Haiti	43	0	-9
Haiti	42	0	-9
Haiti	12	0	-9
Haiti	3	0	-9
Haiti	11	0	-9
Haiti	50	0	-9
Haiti	34	0	-9
Haiti	53	0	-9
Haiti	87	0	-9
Haiti	NA	NA	-9
Haiti	36	0	-9
Haiti	38	0	-9
Haiti	8	0	-9
Haiti	41	0	-9
Haiti	20	0	-9
Haiti	9	0	-9
Haiti	29	0	-9
Haiti	0	0	-9
Haiti	46	0	-9
Haiti	16	0	-9
Haiti	30	0	-9
Haiti	1	0	-9
Haiti	22	0	-9
Haiti	3	0	-9
Haiti	30	0	-9
Haiti	0	0	-9
Haiti	0	0	-9
Haiti	45	0	-9
Haiti	17	0	-9
Haiti	5	0	-9
Haiti	35	0	-9
Haiti	64	0	-9
Haiti	33	0	-9
Haiti	68	0	-9
Haiti	7	0	-9
Haiti	12	0	-9
Haiti	19	0	-8.8
Haiti	21	0	-8.8
Haiti	21	0	-8.7
Haiti	33	0	-8.7
Haiti	48	0	-8.7
Haiti	11	0	-8.7
Haiti	15	0	-8.7
Haiti	37	0	-8.7
Haiti	4	NA	-8.7
Haiti	25	0	-8.7
Haiti	20	0	-8.7
Haiti	62	0	-8.7
Haiti	30	0	-8.7
Haiti	57	0	-8.7
Haiti	79	0	-8.7
Haiti	86	0	-8.7
Haiti	27	0	-8.7
Haiti	54	0	-8.6
Haiti	46	0	-8.6
Haiti	31	0	-8.6
Haiti	8	0	-8.6
Haiti	54	0	-8.6
Haiti	65	0	-8.6
Haiti	20	0	-8.6
Haiti	8	0	-8.6
Haiti	20	0	-8.6
Haiti	24	0	-8.6
Haiti	15	0	-8.3
Haiti	68	0	-8.3
Haiti	40	0	-8.3
Haiti	32	0	-8.3
Haiti	12	0	-8.3
Haiti	55	0	-8.3
Haiti	22	0	-8.25
Haiti	9	0	-8.25
Haiti	29	0	-8.25
Haiti	48	0	-8.25
Haiti	42	0	-8.25
Haiti	31	0	-8.25
Haiti	22	0	-8.25
Haiti	21	0	-8.25
Haiti	44	0	-8.25
Haiti	2	0	-8.25
Haiti	21	0	-8.25
Haiti	47	0	-8.25
Haiti	17	0	-8.25
Haiti	60	0	-8.25
Haiti	2	0	-8.25
Haiti	22	0	-8.25
Haiti	23	0	-8.25
Haiti	22	0	-8.25
Haiti	80	0	-8.25
Haiti	NA	NA	-8.25
Haiti	16	0	-8.25
Haiti	18	0	-8.25
Haiti	14	0	-8.25
Haiti	3	0	-8.25
Haiti	NA	NA	-8.25
Haiti	10	0	-8.25
Haiti	25	0	-8.25
Haiti	12	0	-8.25
Haiti	16	0	-8.25
Haiti	42	0	-8.25
Haiti	67	0	-8.25
Haiti	16	NA	-8.25
Haiti	1	0	-8.25
Haiti	0	0	-8.25
Haiti	8	0	-8.25
Haiti	42	0	-8.25
Haiti	43	0	-8.25
Haiti	73	0	-8.25
Haiti	75	0	-8.25
Haiti	8	0	-8
Haiti	1	0	-8
Haiti	55	0	-8
Haiti	6	0	-8
Haiti	79	0	-8
Haiti	62	0	-8
Haiti	17	0	-8
Haiti	5	0	-8
Haiti	37	0	-8
Haiti	20	0	-8
Haiti	80	0	-8
Haiti	69	0	-8
Haiti	50	0	-8
Haiti	64	0	-8
Haiti	31	0	-7.95
Haiti	37	0	-7.95
Haiti	52	0	-7.95
Haiti	54	0	-7.95
Haiti	9	0	-7.95
Haiti	49	0	-7.95
Haiti	0	0	-7.95
Haiti	26	0	-7.95
Haiti	35	0	-7.95
Haiti	2	0	-7.95
Haiti	65	0	-7.95
Haiti	14	0	-7.8
Haiti	45	0	-7.8
Haiti	15	0	-7.8
Haiti	61	0	-7.6
Haiti	45	0	-7.6
Haiti	14	0	-7.6
Haiti	48	0	-7.6
Haiti	69	0	-7.6
Haiti	30	0	-7.6
Haiti	25	0	-7.6
Haiti	28	0	-7.6
Haiti	30	0	-7.6
Haiti	0	0	-7.6
Haiti	3	1	-7.525
Haiti	38	1	-7.525
Haiti	65	1	-7.525
Haiti	99	0	-7.5
Haiti	36	0	-7.5
Haiti	24	0	-7.5
Haiti	8	0	-7.5
Haiti	50	0	-7.5
Haiti	50	0	-7.5
Haiti	25	0	-7.5
Haiti	1	0	-7.5
Haiti	14	0	-7.5
Haiti	12	0	-7.5
Haiti	18	0	-7.5
Haiti	36	0	-7.5
Haiti	57	0	-7.5
Haiti	50	0	-7.5
Haiti	2	0	-7.5
Haiti	8	0	-7.5
Haiti	0	0	-7.5
Haiti	28	0	-7.5
Haiti	56	0	-7.5
Haiti	NA	NA	-7.5
Haiti	0	0	-7.5
Haiti	4	0	-7.5
Haiti	28	0	-7.5
Haiti	8	0	-7.5
Haiti	7	0	-7.5
Haiti	22	0	-7.5
Haiti	55	0	-7.5
Haiti	72	0	-7.5
Haiti	10	0	-7.5
Haiti	12	0	-7.5
Haiti	22	0	-7.5
Haiti	15	0	-7.5
Haiti	18	0	-7.5
Haiti	71	0	-7.5
Haiti	27	0	-7.5
Haiti	32	0	-7.5
Haiti	18	0	-7.5
Haiti	8	0	-7.5
Haiti	4	0	-7.5
Haiti	51	0	-7.5
Haiti	36	0	-7.5
Haiti	9	0	-7.5
Haiti	21	0	-7.5
Haiti	84	0	-7.5
Haiti	11	0	-7.5
Haiti	52	0	-7.5
Haiti	30	0	-7.5
Haiti	NA	NA	-7.5
Haiti	1	0	-7.5
Haiti	24	0	-7.5
Haiti	49	0	-7.5
Haiti	0	0	-7.5
Haiti	40	0	-7.5
Haiti	18	0	-7.5
Haiti	19	0	-7.5
Haiti	13	0	-7.5
Haiti	20	0	-7.5
Haiti	42	0	-7.5
Haiti	34	0	-7.5
Haiti	15	0	-7.5
Haiti	3	0	-7.5
Haiti	17	0	-7.5
Haiti	63	0	-7.5
Haiti	NA	NA	-7.5
Haiti	35	0	-7.5
Haiti	57	0	-7.3
Haiti	19	0	-7.3
Haiti	66	0	-7.3
Haiti	28	0	-7.2
Haiti	11	0	-7.2
Haiti	17	0	-7.2
Haiti	45	0	-7.2
Haiti	36	0	-7.2
Haiti	46	0	-7.2
Haiti	20	0	-7.2
Haiti	9	0	-7.2
Haiti	9	0	-7.2
Haiti	7	0	-7
Haiti	17	0	-7
Haiti	40	0	-7
Haiti	18	0	-7
Haiti	45	0	-7
Haiti	81	0	-7
Haiti	29	0	-7
Haiti	13	0	-7
Haiti	38	0	-7
Haiti	19	0	-7
Haiti	34	0	-7
Haiti	4	0	-7
Haiti	10	0	-7
Haiti	38	0	-7
Haiti	51	0	-7
Haiti	12	0	-7
Haiti	67	0	-7
Haiti	7	0	-7
Haiti	NA	NA	-7
Haiti	24	0	-7
Haiti	59	0	-7
Haiti	32	0	-7
Haiti	35	0	-6.8
Haiti	29	0	-6.8
Haiti	54	0	-6.75
Haiti	11	0	-6.75
Haiti	58	0	-6.75
Haiti	5	0	-6.75
Haiti	55	0	-6.75
Haiti	7	0	-6.75
Haiti	15	0	-6.75
Haiti	30	0	-6.75
Haiti	33	0	-6.75
Haiti	20	0	-6.75
Haiti	40	0	-6.75
Haiti	2	0	-6.75
Haiti	3	0	-6.75
Haiti	32	0	-6.75
Haiti	NA	NA	-6.75
Haiti	28	0	-6.75
Haiti	2	0	-6.75
Haiti	47	0	-6.75
Haiti	27	0	-6.75
Haiti	81	0	-6.75
Haiti	50	0	-6.75
Haiti	69	0	-6.75
Haiti	33	0	-6.75
Haiti	80	0	-6.75
Haiti	28	0	-6.75
Haiti	10	0	-6.75
Haiti	3	0	-6.75
Haiti	29	0	-6.75
Haiti	6	0	-6.75
Haiti	12	0	-6.75
Haiti	12	0	-6.75
Haiti	21	0	-6.75
Haiti	55	0	-6.75
Haiti	8	0	-6.75
Haiti	25	1	-6.65
Haiti	75	0	-6.6
Haiti	35	0	-6.6
Haiti	39	0	-6.6
Haiti	30	0	-6.6
Haiti	61	0	-6.6
Haiti	72	0	-6.6
Haiti	30	0	-6.6
Haiti	18	0	-6.6
Haiti	15	0	-6.6
Haiti	22	0	-6.6
Haiti	14	0	-6.6
Haiti	3	0	-6.6
Haiti	20	0	-6.6
Haiti	10	0	-6.6
Haiti	60	0	-6.6
Haiti	6	0	-6.6
Haiti	60	0	-6.45
Haiti	2	0	-6.45
Haiti	70	0	-6.45
Haiti	34	0	-6.45
Haiti	35	0	-6.45
Haiti	30	0	-6.45
Haiti	27	0	-6.45
Haiti	7	0	-6.45
Haiti	15	0	-6.45
Haiti	13	0	-6.45
Haiti	27	0	-6.3
Haiti	42	0	-6.3
Haiti	2	0	-6.3
Haiti	8	0	-6.3
Haiti	6	0	-6.3
Haiti	22	0	-6
Haiti	1	0	-6
Haiti	21	0	-6
Haiti	32	0	-6
Haiti	30	0	-6
Haiti	25	0	-6
Haiti	29	0	-6
Haiti	37	0	-6
Haiti	50	0	-6
Haiti	6	0	-6
Haiti	51	0	-6
Haiti	33	0	-6
Haiti	39	0	-6
Haiti	30	0	-6
Haiti	8	0	-6
Haiti	19	0	-6
Haiti	4	0	-6
Haiti	38	0	-6
Haiti	48	0	-6
Haiti	40	0	-6
Haiti	11	0	-6
Haiti	12	0	-6
Haiti	36	0	-6
Haiti	60	0	-6
Haiti	66	0	-6
Haiti	4	0	-6
Haiti	30	0	-6
Haiti	6	0	-6
Haiti	18	0	-6
Haiti	65	0	-6
Haiti	15	0	-6
Haiti	80	0	-6
Haiti	27	0	-6
Haiti	10	0	-6
Haiti	11	0	-6
Haiti	21	0	-6
Haiti	6	0	-6
Haiti	18	0	-6
Haiti	25	0	-6
Haiti	14	0	-6
Haiti	11	0	-6
Haiti	8	0	-6
Haiti	45	0	-6
Haiti	2	0	-6
Haiti	4	0	-6
Haiti	51	0	-6
Haiti	25	0	-6
Haiti	70	0	-6
Haiti	26	0	-6
Haiti	81	0	-6
Haiti	9	0	-6
Haiti	15	0	-6
Haiti	38	0	-6
Haiti	26	0	-6
Haiti	30	0	-6
Haiti	14	0	-6
Haiti	3	0	-6
Haiti	43	0	-6
Haiti	8	0	-6
Haiti	2	0	-6
Haiti	37	0	-6
Haiti	25	0	-6
Haiti	26	0	-6
Haiti	67	0	-6
Haiti	29	0	-6
Haiti	8	0	-6
Haiti	5	0	-6
Haiti	6	0	-6
Haiti	37	0	-6
Haiti	30	0	-6
Haiti	37	0	-6
Haiti	1	0	-6
Haiti	69	0	-6
Haiti	52	0	-6
Haiti	37	0	-6
Haiti	20	0	-6
Haiti	40	0	-6
Haiti	17	0	-6
Haiti	0	0	-6
Haiti	15	0	-6
Haiti	15	0	-6
Haiti	0	0	-6
Haiti	8	0	-6
Haiti	26	0	-6
Haiti	6	0	-6
Haiti	20	0	-6
Haiti	5	0	-6
Haiti	37	0	-6
Haiti	13	0	-6
Haiti	32	0	-6
Haiti	58	0	-6
Haiti	30	0	-6
Haiti	69	0	-6
Haiti	32	0	-6
Haiti	69	0	-6
Haiti	54	0	-5.8
Haiti	46	0	-5.8
Haiti	27	0	-5.8
Haiti	39	0	-5.8
Haiti	20	0	-5.8
Haiti	20	0	-5.8
Haiti	44	0	-5.8
Haiti	37	0	-5.8
Haiti	9	0	-5.8
Haiti	3	0	-5.8
Haiti	51	0	-5.7
Haiti	0	0	-5.7
Haiti	36	0	-5.7
Haiti	23	0	-5.7
Haiti	NA	0	-5.7
Haiti	4	0	-5.7
Haiti	2	0	-5.7
Haiti	8	0	-5.7
Haiti	51	0	-5.7
Haiti	24	0	-5.7
Haiti	22	0	-5.7
Haiti	45	0	-5.7
Haiti	55	0	-5.7
Haiti	13	0	-5.6
Haiti	17	0	-5.6
Haiti	89	0	-5.6
Haiti	68	0	-5.6
Haiti	55	0	-5.6
Haiti	23	0	-5.6
Haiti	41	0	-5.6
Haiti	45	0	-5.6
Haiti	30	0	-5.6
Haiti	26	0	-5.6
Haiti	9	0	-5.6
Haiti	16	0	-5.6
Haiti	60	0	-5.6
Haiti	11	0	-5.6
Haiti	11	NA	-5.6
Haiti	10	0	-5.5
Haiti	21	0	-5.3
Haiti	19	0	-5.3
Haiti	19	0	-5.3
Haiti	5	0	-5.3
Haiti	4	0	-5.3
Haiti	24	0	-5.3
Haiti	20	0	-5.3
Haiti	3	0	-5.25
Haiti	8	0	-5.25
Haiti	73	0	-5.25
Haiti	58	0	-5.25
Haiti	18	0	-5.25
Haiti	16	0	-5.25
Haiti	49	0	-5.25
Haiti	31	0	-5.25
Haiti	50	0	-5.25
Haiti	52	0	-5.25
Haiti	4	0	-5.25
Haiti	31	0	-5.25
Haiti	1	0	-5.25
Haiti	10	0	-5.25
Haiti	96	0	-5.25
Haiti	58	0	-5.25
Haiti	65	0	-5.25
Haiti	26	0	-5.25
Haiti	55	0	-5.25
Haiti	22	0	-5.25
Haiti	3	0	-5.25
Haiti	13	0	-5.25
Haiti	6	0	-5.25
Haiti	3	0	-5.25
Haiti	59	0	-5.25
Haiti	21	0	-5.25
Haiti	51	0	-5.25
Haiti	50	0	-5.25
Haiti	59	0	-5.25
Haiti	31	0	-5.25
Haiti	19	0	-5.25
Haiti	0	0	-5.25
Haiti	28	0	-5.25
Haiti	8	0	-5.25
Haiti	10	0	-5.25
Haiti	11	0	-5.25
Haiti	1	0	-5.25
Haiti	36	0	-5.25
Haiti	31	0	-5.25
Haiti	1	0	-5.25
Haiti	42	0	-5.25
Haiti	66	0	-5.25
Haiti	5	0	-5.25
Haiti	55	0	-5.25
Haiti	34	0	-5.25
Haiti	NA	NA	-5.25
Haiti	3	0	-5
Haiti	23	0	-5
Haiti	3	0	-5
Haiti	4	0	-5
Haiti	40	0	-5
Haiti	27	0	-5
Haiti	75	0	-5
Haiti	80	0	-5
Haiti	27	0	-5
Haiti	7	0	-5
Haiti	21	0	-5
Haiti	24	0	-5
Haiti	65	0	-5
Haiti	1	0	-5
Haiti	20	0	-5
Haiti	10	0	-5
Haiti	23	0	-5
Haiti	60	0	-5
Haiti	10	0	-5
Haiti	40	0	-5
Haiti	29	0	-5
Haiti	30	0	-5
Haiti	65	0	-5
Haiti	19	0	-5
Haiti	4	0	-5
Haiti	95	0	-5
Haiti	23	0	-5
Haiti	31	0	-5
Haiti	16	0	-4.95
Haiti	19	0	-4.95
Haiti	9	0	-4.95
Haiti	3	0	-4.95
Haiti	6	0	-4.95
Haiti	30	0	-4.95
Haiti	22	0	-4.95
Haiti	37	0	-4.95
Haiti	16	0	-4.95
Haiti	37	0	-4.95
Haiti	2	0	-4.95
Haiti	64	0	-4.95
Haiti	20	0	-4.95
Haiti	48	0	-4.95
Haiti	7	0	-4.95
Haiti	32	0	-4.95
Haiti	79	0	-4.8
Haiti	47	0	-4.8
Haiti	23	0	-4.8
Haiti	3	0	-4.8
Haiti	52	0	-4.8
Haiti	12	0	-4.6
Haiti	60	0	-4.6
Haiti	92	0	-4.6
Haiti	10	0	-4.6
Haiti	88	0	-4.6
Haiti	40	0	-4.6
Haiti	62	0	-4.6
Haiti	11	0	-4.6
Haiti	13	0	-4.6
Haiti	34	0	-4.6
Haiti	0	0	-4.6
Haiti	19	0	-4.6
Haiti	42	0	-4.6
Haiti	16	0	-4.6
Haiti	25	0	-4.6
Haiti	5	0	-4.6
Haiti	13	0	-4.6
Haiti	4	0	-4.6
Haiti	15	0	-4.6
Haiti	71	0	-4.6
Haiti	15	0	-4.6
Haiti	8	0	-4.5
Haiti	32	0	-4.5
Haiti	NA	NA	-4.5
Haiti	53	0	-4.5
Haiti	9	0	-4.5
Haiti	19	0	-4.5
Haiti	22	0	-4.5
Haiti	1	0	-4.5
Haiti	3	0	-4.5
Haiti	48	0	-4.5
Haiti	75	0	-4.5
Haiti	26	0	-4.5
Haiti	7	0	-4.5
Haiti	60	0	-4.5
Haiti	21	0	-4.5
Haiti	42	0	-4.5
Haiti	56	0	-4.5
Haiti	7	0	-4.5
Haiti	31	0	-4.5
Haiti	10	0	-4.5
Haiti	11	0	-4.5
Haiti	43	0	-4.5
Haiti	7	0	-4.5
Haiti	57	NA	-4.5
Haiti	3	0	-4.5
Haiti	70	0	-4.5
Haiti	65	0	-4.5
Haiti	90	0	-4.5
Haiti	13	0	-4.5
Haiti	22	0	-4.5
Haiti	40	0	-4.5
Haiti	2	0	-4.5
Haiti	3	0	-4.5
Haiti	73	0	-4.5
Haiti	65	0	-4.5
Haiti	62	0	-4.5
Haiti	NA	NA	-4.5
Haiti	37	0	-4.5
Haiti	66	0	-4.5
Haiti	18	0	-4.5
Haiti	2	0	-4.5
Haiti	46	0	-4.5
Haiti	3	0	-4.5
Haiti	39	0	-4.5
Haiti	5	0	-4.5
Haiti	51	0	-4.5
Haiti	64	0	-4.5
Haiti	34	0	-4.5
Haiti	53	0	-4.5
Haiti	54	0	-4.5
Haiti	NA	NA	-4.5
Haiti	26	0	-4.5
Haiti	17	0	-4.5
Haiti	70	0	-4.5
Haiti	18	0	-4.5
Haiti	8	0	-4.5
Haiti	11	0	-4.5
Haiti	56	0	-4.3
Haiti	NA	NA	-4.3
Haiti	8	0	-4.3
Haiti	27	0	-4.3
Haiti	NA	NA	-4.3
Haiti	77	0	-4.3
Haiti	40	0	-4.3
Haiti	0	0	-4.3
Haiti	33	0	-4.3
Haiti	15	0	-4.3
Haiti	40	0	-4.3
Haiti	22	0	-4.3
Haiti	NA	NA	-4.3
Haiti	52	0	-4.3
Haiti	17	0	-4.3
Haiti	9	0	-4.3
Haiti	11	0	-4.3
Haiti	33	0	-4.3
Haiti	18	0	-4.3
Haiti	16	0	-4.3
Haiti	14	0	-4.3
Haiti	53	0	-4.2
Haiti	49	0	-4.2
Haiti	49	0	-4.2
Haiti	15	0	-4.2
Haiti	43	0	-4.2
Haiti	18	0	-4.2
Haiti	65	0	-4.2
Haiti	70	0	-4.2
Haiti	3	0	-4.2
Haiti	7	0	-4.2
Haiti	21	0	-4.2
Haiti	36	0	-4.2
Haiti	14	0	-4.2
Haiti	34	0	-4.2
Haiti	65	0	-4.2
Haiti	19	0	-4.2
Haiti	40	0	-4.2
Haiti	39	0	-4
Haiti	37	0	-4
Haiti	67	0	-4
Haiti	6	0	-4
Haiti	24	0	-4
Haiti	5	0	-4
Haiti	44	0	-4
Haiti	14	0	-4
Haiti	34	0	-4
Haiti	15	0	-4
Haiti	17	0	-4
Haiti	16	0	-4
Haiti	68	0	-4
Haiti	10	0	-4
Haiti	31	0	-4
Haiti	11	0	-4
Haiti	20	0	-4
Haiti	77	0	-4
Haiti	28	0	-4
Haiti	32	0	-4
Haiti	81	0	-4
Haiti	52	0	-4
Haiti	69	0	-4
Haiti	8	0	-4
Haiti	5	0	-4
Haiti	22	0	-4
Haiti	13	0	-4
Haiti	33	0	-4
Haiti	8	0	-4
Haiti	14	0	-4
Haiti	32	0	-4
Haiti	2	0	-4
Haiti	NA	NA	-4
Haiti	31	0	-4
Haiti	65	0	-4
Haiti	50	0	-4
Haiti	46	0	-4
Haiti	82	0	-4
Haiti	31	0	-4
Haiti	29	0	-4
Haiti	16	0	-4
Haiti	54	0	-4
Haiti	11	0	-4
Haiti	57	0	-4
Haiti	20	0	-4
Haiti	12	0	-4
Haiti	3	0	-4
Haiti	54	0	-4
Haiti	9	0	-4
Haiti	70	0	-4
Haiti	39	0	-4
Haiti	58	0	-4
Haiti	3	0	-4
Haiti	21	0	-3.8
Haiti	25	0	-3.8
Haiti	18	0	-3.8
Haiti	22	0	-3.8
Haiti	1	0	-3.8
Haiti	3	0	-3.8
Haiti	41	0	-3.8
Haiti	3	0	-3.8
Haiti	48	0	-3.8
Haiti	38	0	-3.8
Haiti	20	0	-3.8
Haiti	47	0	-3.8
Haiti	NA	NA	-3.8
Haiti	27	0	-3.8
Haiti	4	0	-3.8
Haiti	30	0	-3.8
Haiti	27	0	-3.8
Haiti	18	0	-3.8
Haiti	64	0	-3.8
Haiti	6	0	-3.8
Haiti	1	0	-3.8
Haiti	NA	NA	-3.8
Haiti	70	0	-3.8
Haiti	14	0	-3.8
Haiti	7	0	-3.8
Haiti	7	0	-3.8
Haiti	29	0	-3.8
Haiti	1	0	-3.8
Haiti	50	0	-3.8
Haiti	3	0	-3.75
Haiti	59	0	-3.75
Haiti	34	0	-3.75
Haiti	52	0	-3.75
Haiti	12	0	-3.75
Haiti	45	0	-3.75
Haiti	6	0	-3.75
Haiti	6	0	-3.75
Haiti	30	0	-3.75
Haiti	21	0	-3.75
Haiti	47	0	-3.75
Haiti	21	0	-3.75
Haiti	2	0	-3.75
Haiti	NA	NA	-3.75
Haiti	28	0	-3.75
Haiti	11	0	-3.75
Haiti	19	0	-3.75
Haiti	4	0	-3.75
Haiti	13	0	-3.75
Haiti	0	0	-3.75
Haiti	48	0	-3.75
Haiti	10	0	-3.75
Haiti	19	0	-3.75
Haiti	59	0	-3.75
Haiti	64	0	-3.75
Haiti	65	0	-3.75
Haiti	36	0	-3.75
Haiti	38	0	-3.75
Haiti	15	0	-3.75
Haiti	12	0	-3.75
Haiti	13	0	-3.75
Haiti	0	0	-3.75
Haiti	28	0	-3.75
Haiti	62	0	-3.75
Haiti	13	0	-3.75
Haiti	56	0	-3.75
Haiti	23	0	-3.75
Haiti	29	0	-3.75
Haiti	69	0	-3.75
Haiti	25	0	-3.75
Haiti	37	0	-3.75
Haiti	30	0	-3.75
Haiti	26	0	-3.75
Haiti	46	0	-3.75
Haiti	40	0	-3.75
Haiti	58	0	-3.75
Haiti	32	0	-3.75
Haiti	27	0	-3.75
Haiti	2	0	-3.75
Haiti	20	0	-3.75
Haiti	29	0	-3.75
Haiti	53	0	-3.75
Haiti	30	0	-3.75
Haiti	11	0	-3.75
Haiti	30	0	-3.75
Haiti	22	NA	-3.75
Haiti	2	0	-3.75
Haiti	45	0	-3.6
Haiti	60	0	-3.6
Haiti	85	0	-3.6
Haiti	15	0	-3.6
Haiti	20	0	-3.6
Haiti	16	0	-3.6
Haiti	90	0	-3.6
Haiti	10	0	-3.6
Haiti	24	0	-3.6
Haiti	66	0	-3.6
Haiti	40	0	-3.6
Haiti	30	0	-3.6
Haiti	10	0	-3.6
Haiti	38	0	-3.6
Haiti	50	0	-3.5
Haiti	5	0	-3.5
Haiti	5	0	-3.5
Haiti	8	0	-3.5
Haiti	35	0	-3.5
Haiti	6	0	-3.5
Haiti	19	0	-3.5
Haiti	19	0	-3.5
Haiti	49	0	-3.5
Haiti	37	0	-3.5
Haiti	51	0	-3.5
Haiti	76	0	-3.5
Haiti	7	0	-3.5
Haiti	54	0	-3.5
Haiti	20	0	-3.5
Haiti	82	0	-3.5
Haiti	33	0	-3.5
Haiti	86	0	-3.5
Haiti	50	0	-3.5
Haiti	11	0	-3.5
Haiti	90	0	-3.45
Haiti	16	0	-3.45
Haiti	15	0	-3.45
Haiti	4	0	-3.45
Haiti	48	0	-3.45
Haiti	32	0	-3.45
Haiti	2	0	-3.45
Haiti	8	0	-3.45
Haiti	39	0	-3.45
Haiti	5	0	-3.45
Haiti	2	0	-3.3
Haiti	8	0	-3.3
Haiti	46	0	-3.3
Haiti	NA	NA	-3.3
Haiti	70	0	-3.3
Haiti	34	0	-3.3
Haiti	38	0	-3.3
Haiti	50	0	-3.3
Haiti	48	0	-3.3
Haiti	60	0	-3.3
Haiti	4	0	-3.3
Haiti	5	0	-3.3
Haiti	21	0	-3.3
Haiti	42	0	-3.3
Haiti	NA	NA	-3.3
Haiti	28	0	-3.3
Haiti	63	0	-3.3
Haiti	41	0	-3.3
Haiti	12	0	-3.3
Haiti	62	0	-3.3
Haiti	32	0	-3.3
Haiti	4	0	-3.3
Haiti	60	0	-3.3
Haiti	26	0	-3.3
Haiti	26	0	-3.3
Haiti	0	0	-3.3
Haiti	50	0	-3.3
Haiti	24	0	-3.3
Haiti	40	0	-3.3
Haiti	24	0	-3.3
Haiti	30	0	-3.3
Haiti	9	0	-3.3
Haiti	NA	NA	-3.3
Haiti	60	0	-3.3
Haiti	50	0	-3.3
Haiti	80	0	-3.3
Haiti	10	0	-3.3
Haiti	36	0	-3.3
Haiti	30	0	-3.3
Haiti	17	0	-3.3
Haiti	13	0	-3.3
Haiti	28	0	-3.3
Haiti	23	0	-3.3
Haiti	40	0	-3.3
Haiti	21	0	-3.3
Haiti	49	0	-3.3
Haiti	17	1	-3.15
Haiti	75	0	-3
Haiti	6	0	-3
Haiti	48	0	-3
Haiti	48	0	-3
Haiti	50	0	-3
Haiti	23	0	-3
Haiti	20	0	-3
Haiti	37	0	-3
Haiti	74	0	-3
Haiti	6	0	-3
Haiti	45	0	-3
Haiti	20	0	-3
Haiti	5	0	-3
Haiti	72	0	-3
Haiti	55	0	-3
Haiti	51	0	-3
Haiti	50	0	-3
Haiti	60	0	-3
Haiti	58	0	-3
Haiti	38	0	-3
Haiti	27	0	-3
Haiti	18	0	-3
Haiti	10	0	-3
Haiti	15	0	-3
Haiti	NA	NA	-3
Haiti	2	0	-3
Haiti	35	0	-3
Haiti	21	0	-3
Haiti	45	0	-3
Haiti	29	0	-3
Haiti	7	0	-3
Haiti	13	0	-3
Haiti	73	0	-3
Haiti	44	0	-3
Haiti	17	0	-3
Haiti	7	0	-3
Haiti	13	0	-3
Haiti	24	0	-3
Haiti	18	0	-3
Haiti	55	0	-3
Haiti	43	0	-3
Haiti	7	0	-3
Haiti	29	0	-3
Haiti	20	0	-3
Haiti	7	0	-3
Haiti	23	0	-3
Haiti	14	0	-3
Haiti	33	0	-3
Haiti	31	0	-3
Haiti	6	0	-3
Haiti	67	0	-3
Haiti	36	0	-3
Haiti	20	0	-3
Haiti	35	0	-3
Haiti	3	0	-3
Haiti	2	0	-3
Haiti	7	0	-3
Haiti	84	0	-3
Haiti	75	0	-3
Haiti	6	0	-3
Haiti	16	0	-3
Haiti	55	0	-3
Haiti	7	0	-3
Haiti	65	0	-3
Haiti	70	0	-3
Haiti	15	0	-3
Haiti	6	0	-3
Haiti	27	0	-3
Haiti	13	0	-3
Haiti	42	0	-3
Haiti	15	0	-3
Haiti	NA	NA	-3
Haiti	53	0	-3
Haiti	11	0	-3
Haiti	78	0	-3
Haiti	28	0	-3
Haiti	27	0	-3
Haiti	44	0	-3
Haiti	12	0	-3
Haiti	56	0	-3
Haiti	31	0	-3
Haiti	60	0	-3
Haiti	55	0	-3
Haiti	14	0	-3
Haiti	20	0	-3
Haiti	31	0	-3
Haiti	69	0	-3
Haiti	45	0	-3
Haiti	9	0	-3
Haiti	32	0	-3
Haiti	33	0	-3
Haiti	13	0	-3
Haiti	7	0	-3
Haiti	20	0	-3
Haiti	6	0	-3
Haiti	30	0	-3
Haiti	74	0	-3
Haiti	69	0	-3
Haiti	3	0	-3
Haiti	63	0	-3
Haiti	4	0	-3
Haiti	30	0	-3
Haiti	59	0	-3
Haiti	4	0	-3
Haiti	7	0	-3
Haiti	15	0	-3
Haiti	14	0	-3
Haiti	25	0	-3
Haiti	3	0	-3
Haiti	13	0	-3
Haiti	30	0	-3
Haiti	7	0	-3
Haiti	9	0	-3
Haiti	4	0	-3
Haiti	9	0	-3
Haiti	9	0	-2.8
Haiti	1	0	-2.8
Haiti	34	0	-2.8
Haiti	7	0	-2.8
Haiti	5	0	-2.8
Haiti	39	0	-2.8
Haiti	18	0	-2.8
Haiti	60	0	-2.8
Haiti	37	0	-2.8
Haiti	11	0	-2.8
Haiti	3	0	-2.8
Haiti	2	0	-2.8
Haiti	62	0	-2.8
Haiti	15	0	-2.8
Haiti	28	0	-2.8
Haiti	6	0	-2.8
Haiti	26	0	-2.8
Haiti	50	0	-2.8
Haiti	7	0	-2.8
Haiti	1	0	-2.8
Haiti	47	0	-2.8
Haiti	3	0	-2.8
Haiti	13	0	-2.8
Haiti	28	0	-2.8
Haiti	49	0	-2.8
Haiti	25	0	-2.8
Haiti	3	0	-2.8
Haiti	38	0	-2.8
Haiti	65	0	-2.8
Haiti	48	0	-2.8
Haiti	0	0	-2.8
Haiti	95	0	-2.8
Haiti	75	0	-2.8
Haiti	25	0	-2.8
Haiti	23	0	-2.8
Haiti	NA	NA	-2.8
Haiti	33	0	-2.8
Haiti	28	0	-2.7
Haiti	60	0	-2.7
Haiti	32	0	-2.7
Haiti	31	0	-2.7
Haiti	3	0	-2.7
Haiti	53	0	-2.7
Haiti	16	0	-2.6
Haiti	43	0	-2.6
Haiti	27	0	-2.6
Haiti	8	0	-2.6
Haiti	52	0	-2.6
Haiti	46	0	-2.6
Haiti	19	0	-2.6
Haiti	25	0	-2.6
Haiti	76	0	-2.6
Haiti	47	0	-2.6
Haiti	16	0	-2.6
Haiti	20	0	-2.6
Haiti	24	0	-2.6
Haiti	23	0	-2.6
Haiti	6	0	-2.6
Haiti	2	0	-2.6
Haiti	57	0	-2.5
Haiti	22	0	-2.5
Haiti	69	0	-2.5
Haiti	24	0	-2.5
Haiti	8	0	-2.5
Haiti	18	0	-2.5
Haiti	24	0	-2.5
Haiti	39	0	-2.5
Haiti	39	0	-2.5
Haiti	48	0	-2.5
Haiti	1	0	-2.5
Haiti	71	0	-2.5
Haiti	55	0	-2.5
Haiti	50	0	-2.5
Haiti	28	0	-2.5
Haiti	4	0	-2.5
Haiti	1	0	-2.5
Haiti	26	0	-2.5
Haiti	15	0	-2.5
Haiti	30	0	-2.5
Haiti	29	0	-2.5
Haiti	55	0	-2.5
Haiti	56	0	-2.5
Haiti	57	0	-2.5
Haiti	26	0	-2.5
Haiti	40	0	-2.5
Haiti	20	0	-2.5
Haiti	21	0	-2.5
Haiti	20	0	-2.5
Haiti	13	0	-2.5
Haiti	40	0	-2.5
Haiti	72	0	-2.5
Haiti	39	0	-2.5
Haiti	17	0	-2.5
Haiti	87	0	-2.5
Haiti	19	0	-2.5
Haiti	1	0	-2.5
Haiti	16	0	-2.5
Haiti	1	0	-2.3
Haiti	20	0	-2.3
Haiti	5	0	-2.3
Haiti	53	0	-2.3
Haiti	27	0	-2.3
Haiti	25	0	-2.3
Haiti	3	0	-2.3
Haiti	40	0	-2.3
Haiti	37	0	-2.3
Haiti	6	0	-2.3
Haiti	23	0	-2.3
Haiti	70	0	-2.3
Haiti	40	0	-2.3
Haiti	45	0	-2.3
Haiti	42	0	-2.3
Haiti	24	0	-2.3
Haiti	60	0	-2.3
Haiti	23	0	-2.3
Haiti	7	0	-2.3
Haiti	24	0	-2.3
Haiti	39	0	-2.3
Haiti	9	0	-2.3
Haiti	20	0	-2.3
Haiti	12	0	-2.3
Haiti	14	0	-2.3
Haiti	48	0	-2.3
Haiti	17	0	-2.3
Haiti	21	0	-2.3
Haiti	13	0	-2.3
Haiti	59	0	-2.3
Haiti	75	0	-2.3
Haiti	15	0	-2.3
Haiti	0	0	-2.3
Haiti	20	0	-2.3
Haiti	60	0	-2.3
Haiti	13	0	-2.3
Haiti	16	0	-2.3
Haiti	52	0	-2.3
Haiti	41	0	-2.3
Haiti	68	0	-2.3
Haiti	63	0	-2.3
Haiti	24	0	-2.3
Haiti	6	0	-2.3
Haiti	5	0	-2.3
Haiti	24	0	-2.3
Haiti	1	0	-2.3
Haiti	1	0	-2.3
Haiti	45	0	-2.3
Haiti	12	0	-2.3
Haiti	6	0	-2.3
Haiti	18	0	-2.3
Haiti	28	0	-2.3
Haiti	26	0	-2.3
Haiti	31	0	-2.3
Haiti	23	0	-2.3
Haiti	25	0	-2.3
Haiti	68	0	-2.3
Haiti	39	0	-2.3
Haiti	60	0	-2.3
Haiti	53	0	-2.3
Haiti	22	0	-2.3
Haiti	26	0	-2.3
Haiti	19	0	-2.3
Haiti	16	0	-2.25
Haiti	60	0	-2.25
Haiti	50	0	-2.25
Haiti	6	0	-2.25
Haiti	16	0	-2.25
Haiti	17	0	-2.25
Haiti	60	0	-2.25
Haiti	56	0	-2.25
Haiti	12	0	-2.25
Haiti	NA	NA	-2.25
Haiti	45	0	-2.25
Haiti	24	0	-2.25
Haiti	19	0	-2.25
Haiti	NA	NA	-2.25
Haiti	80	0	-2.25
Haiti	3	0	-2.25
Haiti	25	0	-2.25
Haiti	22	0	-2.25
Haiti	22	0	-2.25
Haiti	47	0	-2.25
Haiti	6	0	-2.25
Haiti	8	0	-2.25
Haiti	13	0	-2.25
Haiti	23	0	-2.25
Haiti	49	0	-2.25
Haiti	39	0	-2.25
Haiti	NA	0	-2.25
Haiti	21	0	-2.25
Haiti	17	0	-2.25
Haiti	19	0	-2.25
Haiti	42	0	-2.25
Haiti	22	0	-2.25
Haiti	38	0	-2.25
Haiti	81	0	-2.25
Haiti	31	0	-2.25
Haiti	32	0	-2.25
Haiti	68	0	-2.25
Haiti	8	0	-2.25
Haiti	17	0	-2.25
Haiti	10	0	-2.25
Haiti	36	0	-2.25
Haiti	7	0	-2.25
Haiti	4	0	-2.25
Haiti	32	0	-2.25
Haiti	34	0	-2.25
Haiti	19	0	-2.25
Haiti	21	0	-2.25
Haiti	19	0	-2
Haiti	51	0	-2
Haiti	28	0	-2
Haiti	55	0	-2
Haiti	24	0	-2
Haiti	38	0	-2
Haiti	38	0	-2
Haiti	35	0	-2
Haiti	13	0	-2
Haiti	22	0	-2
Haiti	4	0	-2
Haiti	67	0	-2
Haiti	25	0	-2
Haiti	17	0	-2
Haiti	2	0	-2
Haiti	35	0	-2
Haiti	20	0	-2
Haiti	72	0	-2
Haiti	85	0	-2
Haiti	10	0	-2
Haiti	47	0	-2
Haiti	28	0	-2
Haiti	37	0	-2
Haiti	38	0	-2
Haiti	3	0	-2
Haiti	3	0	-2
Haiti	65	0	-2
Haiti	65	0	-2
Haiti	14	0	-2
Haiti	22	0	-2
Haiti	8	0	-2
Haiti	60	0	-2
Haiti	8	0	-2
Haiti	32	0	-2
Haiti	22	0	-2
Haiti	9	0	-2
Haiti	0	0	-2
Haiti	28	0	-2
Haiti	34	0	-2
Haiti	60	0	-2
Haiti	14	0	-2
Haiti	48	0	-2
Haiti	10	0	-2
Haiti	31	0	-2
Haiti	51	0	-2
Haiti	23	0	-2
Haiti	NA	NA	-2
Haiti	72	0	-2
Haiti	43	0	-2
Haiti	31	0	-2
Haiti	55	0	-2
Haiti	40	0	-2
Haiti	90	0	-2
Haiti	2	0	-2
Haiti	35	0	-2
Haiti	2	0	-2
Haiti	71	0	-2
Haiti	5	0	-2
Haiti	29	0	-2
Haiti	56	0	-2
Haiti	35	0	-1.95
Haiti	44	0	-1.95
Haiti	0	0	-1.95
Haiti	28	0	-1.95
Haiti	3	0	-1.95
Haiti	16	0	-1.95
Haiti	47	0	-1.95
Haiti	18	0	-1.8
Haiti	44	0	-1.8
Haiti	51	0	-1.8
Haiti	6	0	-1.8
Haiti	51	0	-1.8
Haiti	47	0	-1.8
Haiti	40	0	-1.8
Haiti	NA	NA	-1.8
Haiti	22	0	-1.8
Haiti	47	0	-1.8
Haiti	12	NA	-1.8
Haiti	5	0	-1.8
Haiti	46	0	-1.8
Haiti	57	0	-1.8
Haiti	10	0	-1.8
Haiti	32	0	-1.8
Haiti	29	0	-1.8
Haiti	33	0	-1.8
Haiti	24	0	-1.8
Haiti	37	0	-1.8
Haiti	2	0	-1.8
Haiti	22	0	-1.8
Haiti	25	0	-1.8
Haiti	15	0	-1.8
Haiti	30	0	-1.8
Haiti	14	0	-1.8
Haiti	20	0	-1.8
Haiti	14	0	-1.8
Haiti	9	0	-1.8
Haiti	17	0	-1.8
Haiti	17	0	-1.8
Haiti	2	0	-1.8
Haiti	20	0	-1.8
Haiti	21	0	-1.8
Haiti	26	0	-1.8
Haiti	NA	NA	-1.8
Haiti	28	0	-1.8
Haiti	0	0	-1.8
Haiti	10	0	-1.8
Haiti	36	0	-1.8
Haiti	50	0	-1.8
Haiti	35	0	-1.8
Haiti	19	0	-1.8
Haiti	22	0	-1.8
Haiti	19	0	-1.8
Haiti	65	0	-1.8
Haiti	61	0	-1.8
Haiti	70	0	-1.8
Haiti	0	0	-1.8
Haiti	44	0	-1.8
Haiti	25	0	-1.8
Haiti	3	0	-1.8
Haiti	31	0	-1.8
Haiti	49	0	-1.8
Haiti	53	0	-1.8
Haiti	46	0	-1.8
Haiti	15	0	-1.8
Haiti	29	0	-1.8
Haiti	58	0	-1.8
Haiti	5	0	-1.8
Haiti	14	0	-1.8
Haiti	22	0	-1.8
Haiti	80	0	-1.6
Haiti	11	0	-1.6
Haiti	73	0	-1.6
Haiti	15	0	-1.6
Haiti	NA	NA	-1.6
Haiti	70	0	-1.6
Haiti	21	0	-1.6
Haiti	27	0	-1.6
Haiti	20	0	-1.6
Haiti	62	0	-1.6
Haiti	43	0	-1.6
Haiti	65	0	-1.6
Haiti	47	1	-1.6
Haiti	54	0	-1.6
Haiti	20	0	-1.6
Haiti	43	0	-1.6
Haiti	29	0	-1.6
Haiti	11	0	-1.6
Haiti	17	0	-1.6
Haiti	34	0	-1.6
Haiti	30	0	-1.6
Haiti	24	0	-1.6
Haiti	34	0	-1.5
Haiti	28	0	-1.5
Haiti	30	0	-1.5
Haiti	0	0	-1.5
Haiti	22	0	-1.5
Haiti	21	0	-1.5
Haiti	18	0	-1.5
Haiti	60	0	-1.5
Haiti	21	0	-1.5
Haiti	77	0	-1.5
Haiti	46	0	-1.5
Haiti	80	0	-1.5
Haiti	40	0	-1.5
Haiti	15	0	-1.5
Haiti	9	0	-1.5
Haiti	80	0	-1.5
Haiti	51	0	-1.5
Haiti	2	0	-1.5
Haiti	16	0	-1.5
Haiti	12	0	-1.5
Haiti	37	0	-1.5
Haiti	4	0	-1.5
Haiti	NA	NA	-1.5
Haiti	20	0	-1.5
Haiti	48	0	-1.5
Haiti	13	0	-1.5
Haiti	78	0	-1.5
Haiti	40	0	-1.5
Haiti	5	0	-1.5
Haiti	80	0	-1.5
Haiti	3	0	-1.5
Haiti	21	0	-1.5
Haiti	4	0	-1.5
Haiti	50	0	-1.5
Haiti	30	0	-1.5
Haiti	0	0	-1.5
Haiti	27	0	-1.5
Haiti	23	0	-1.5
Haiti	7	0	-1.5
Haiti	41	0	-1.5
Haiti	54	0	-1.5
Haiti	37	0	-1.5
Haiti	15	0	-1.5
Haiti	48	0	-1.5
Haiti	84	0	-1.5
Haiti	37	0	-1.5
Haiti	13	0	-1.5
Haiti	19	0	-1.5
Haiti	1	0	-1.5
Haiti	66	0	-1.5
Haiti	34	0	-1.5
Haiti	4	0	-1.5
Haiti	15	0	-1.5
Haiti	41	0	-1.5
Haiti	12	0	-1.5
Haiti	28	0	-1.5
Haiti	6	0	-1.5
Haiti	31	0	-1.5
Haiti	5	0	-1.5
Haiti	14	0	-1.5
Haiti	95	0	-1.5
Haiti	35	0	-1.5
Haiti	15	0	-1.5
Haiti	47	0	-1.5
Haiti	7	0	-1.5
Haiti	53	0	-1.5
Haiti	7	0	-1.5
Haiti	35	0	-1.5
Haiti	33	0	-1.5
Haiti	6	0	-1.5
Haiti	53	0	-1.5
Haiti	50	0	-1.5
Haiti	4	0	-1.5
Haiti	42	0	-1.5
Haiti	33	0	-1.5
Haiti	56	0	-1.5
Haiti	5	0	-1.5
Haiti	43	0	-1.5
Haiti	27	0	-1.5
Haiti	0	0	-1.5
Haiti	39	0	-1.5
Haiti	32	0	-1.5
Haiti	18	0	-1.5
Haiti	24	0	-1.5
Haiti	47	0	-1.5
Haiti	NA	NA	-1.5
Haiti	27	0	-1.5
Haiti	6	0	-1.5
Haiti	5	0	-1.5
Haiti	52	0	-1.5
Haiti	61	0	-1.5
Haiti	33	0	-1.5
Haiti	19	0	-1.5
Haiti	2	0	-1.5
Haiti	18	0	-1.5
Haiti	24	0	-1.5
Haiti	61	0	-1.5
Haiti	10	0	-1.5
Haiti	2	0	-1.5
Haiti	0	0	-1.5
Haiti	58	0	-1.5
Haiti	10	0	-1.5
Haiti	9	0	-1.5
Haiti	73	0	-1.5
Haiti	40	0	-1.3
Haiti	30	0	-1.3
Haiti	50	0	-1.3
Haiti	24	0	-1.3
Haiti	18	0	-1.3
Haiti	99	0	-1.3
Haiti	63	0	-1.3
Haiti	60	0	-1.3
Haiti	48	0	-1.3
Haiti	56	0	-1.3
Haiti	83	0	-1.3
Haiti	25	0	-1.3
Haiti	8	0	-1.3
Haiti	57	0	-1.3
Haiti	44	0	-1.3
Haiti	5	0	-1.3
Haiti	9	0	-1.3
Haiti	12	0	-1.3
Haiti	52	0	-1.3
Haiti	75	0	-1.3
Haiti	45	0	-1.3
Haiti	3	0	-1.3
Haiti	2	0	-1.3
Haiti	42	0	-1.3
Haiti	NA	NA	-1.3
Haiti	NA	NA	-1.3
Haiti	73	0	-1.3
Haiti	18	0	-1.3
Haiti	21	0	-1.3
Haiti	54	0	-1.3
Haiti	44	0	-1.3
Haiti	45	0	-1.3
Haiti	5	0	-1.3
Haiti	9	0	-1.3
Haiti	64	0	-1.3
Haiti	12	0	-1.3
Haiti	42	0	-1.3
Haiti	56	0	-1.3
Haiti	20	0	-1.3
Haiti	5	0	-1.3
Haiti	18	0	-1.3
Haiti	25	0	-1.3
Haiti	55	0	-1.3
Haiti	22	0	-1.3
Haiti	3	0	-1.3
Haiti	29	0	-1.3
Haiti	10	0	-1.3
Haiti	50	0	-1.3
Haiti	25	0	-1.3
Haiti	50	0	-1.3
Haiti	46	0	-1.3
Haiti	70	0	-1.3
Haiti	63	0	-1.3
Haiti	0	0	-1.3
Haiti	30	0	-1.3
Haiti	35	0	-1.3
Haiti	23	0	-1.3
Haiti	39	0	-1.3
Haiti	46	0	-1.3
Haiti	44	0	-1.3
Haiti	19	0	-1.3
Haiti	22	0	-1.3
Haiti	16	0	-1.3
Haiti	37	0	-1.3
Haiti	33	0	-1.3
Haiti	6	0	-1.3
Haiti	8	0	-1.3
Haiti	20	0	-1.3
Haiti	29	0	-1.3
Haiti	21	0	-1.3
Haiti	25	0	-1.3
Haiti	68	0	-1.3
Haiti	27	0	-1.3
Haiti	24	0	-1.3
Haiti	19	0	-1.2
Haiti	9	0	-1.2
Haiti	17	0	-1.2
Haiti	17	0	-1.2
Haiti	27	0	-1.2
[truncated: 2,463 more rows]
